# Supplementary material
Source: publisher site journal article supplement (https://www.dovepress.com/article/605974)
Supplement: Supplementary file 1 [file 605974%20Supplementary%20Material.docx]

**Supplementary Table Legends:**

**Table S1.** Descriptive criteria for the 5-point dermoscopic image quality scale (DIQS-5) across three domains: Focus & depth of field, sharpness & clarity, and colour.

| **Score** | **Focus & Depth of Field** | **Sharpness & Clarity** | **Colour Fidelity** |
| --- | --- | --- | --- |
| **1  (Very Poor)** | The image is severely out of focus; all areas are blurry. | The image is severely soft; no details are distinguishable. | The image has severely distorted colours or minimal contrast. |
| **2  (Poor)** | The image has noticeable focus issues; only a few areas are focused. | The image has noticeable softness; only a few details are clear. | The image has noticeable colour imbalances or low contrast. |
| **3  (Acceptable)** | The image has adequate focus; some areas are blurry. | The image has adequate detail; some details lack clarity. | The image has adequate colour accuracy and contrast. |
| **4  (Good)** | The image is well-focused; most areas are in focus. | The image is well-defined;  most details are clear. | The image has well-balanced colours or good contrast. |
| **5  (Excellent)** | The entire image is perfectly focused; no areas are blurry. | The entire image is perfectly sharp; all details are clearly distinguishable. | The image has perfectly balanced colours with excellent contrast. |

**Supplementary Figure Legend:**

**
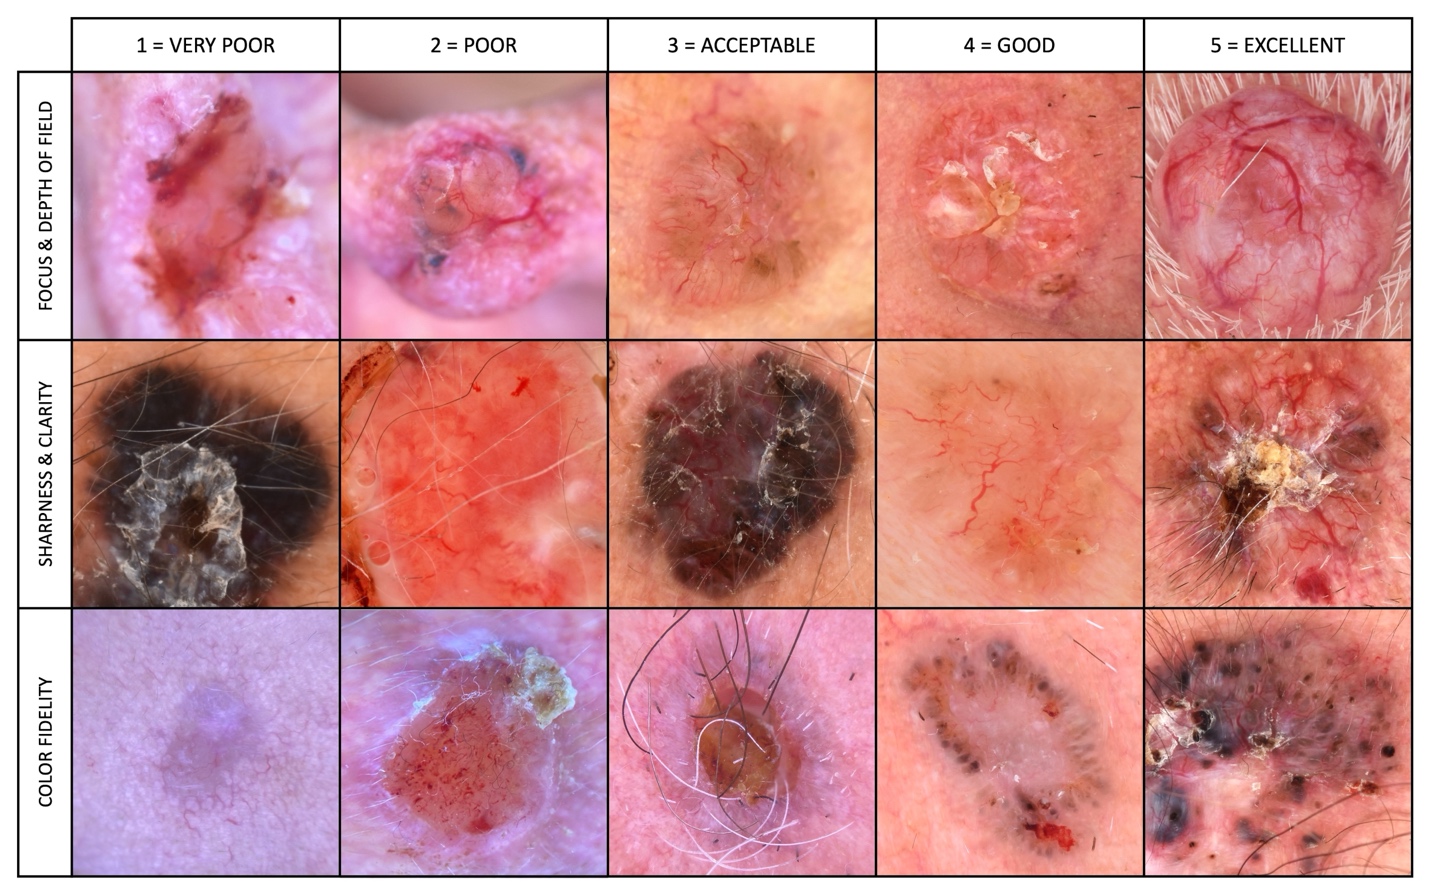
**

**Supplementary Figure 1.** Representative examples illustrating the 5-point dermoscopic image quality scale (DIQS-5) across three domains: Focus & depth of field, sharpness & clarity, and colour fidelity. Each row demonstrates a graded series of images for one quality parameter, from score 1 (very poor) to score 5 (excellent). These reference images were used during the assessment process to standardise and guide quality scoring by evaluators.
